# Supplementary material
Source: PubMed Central journal article supplement (PMC6249057)
Supplement: NIHMS1507982-supplement-2.pdf [file NIHMS1507982-supplement-2.pdf]

IMMUNITY-D-17-00735R2

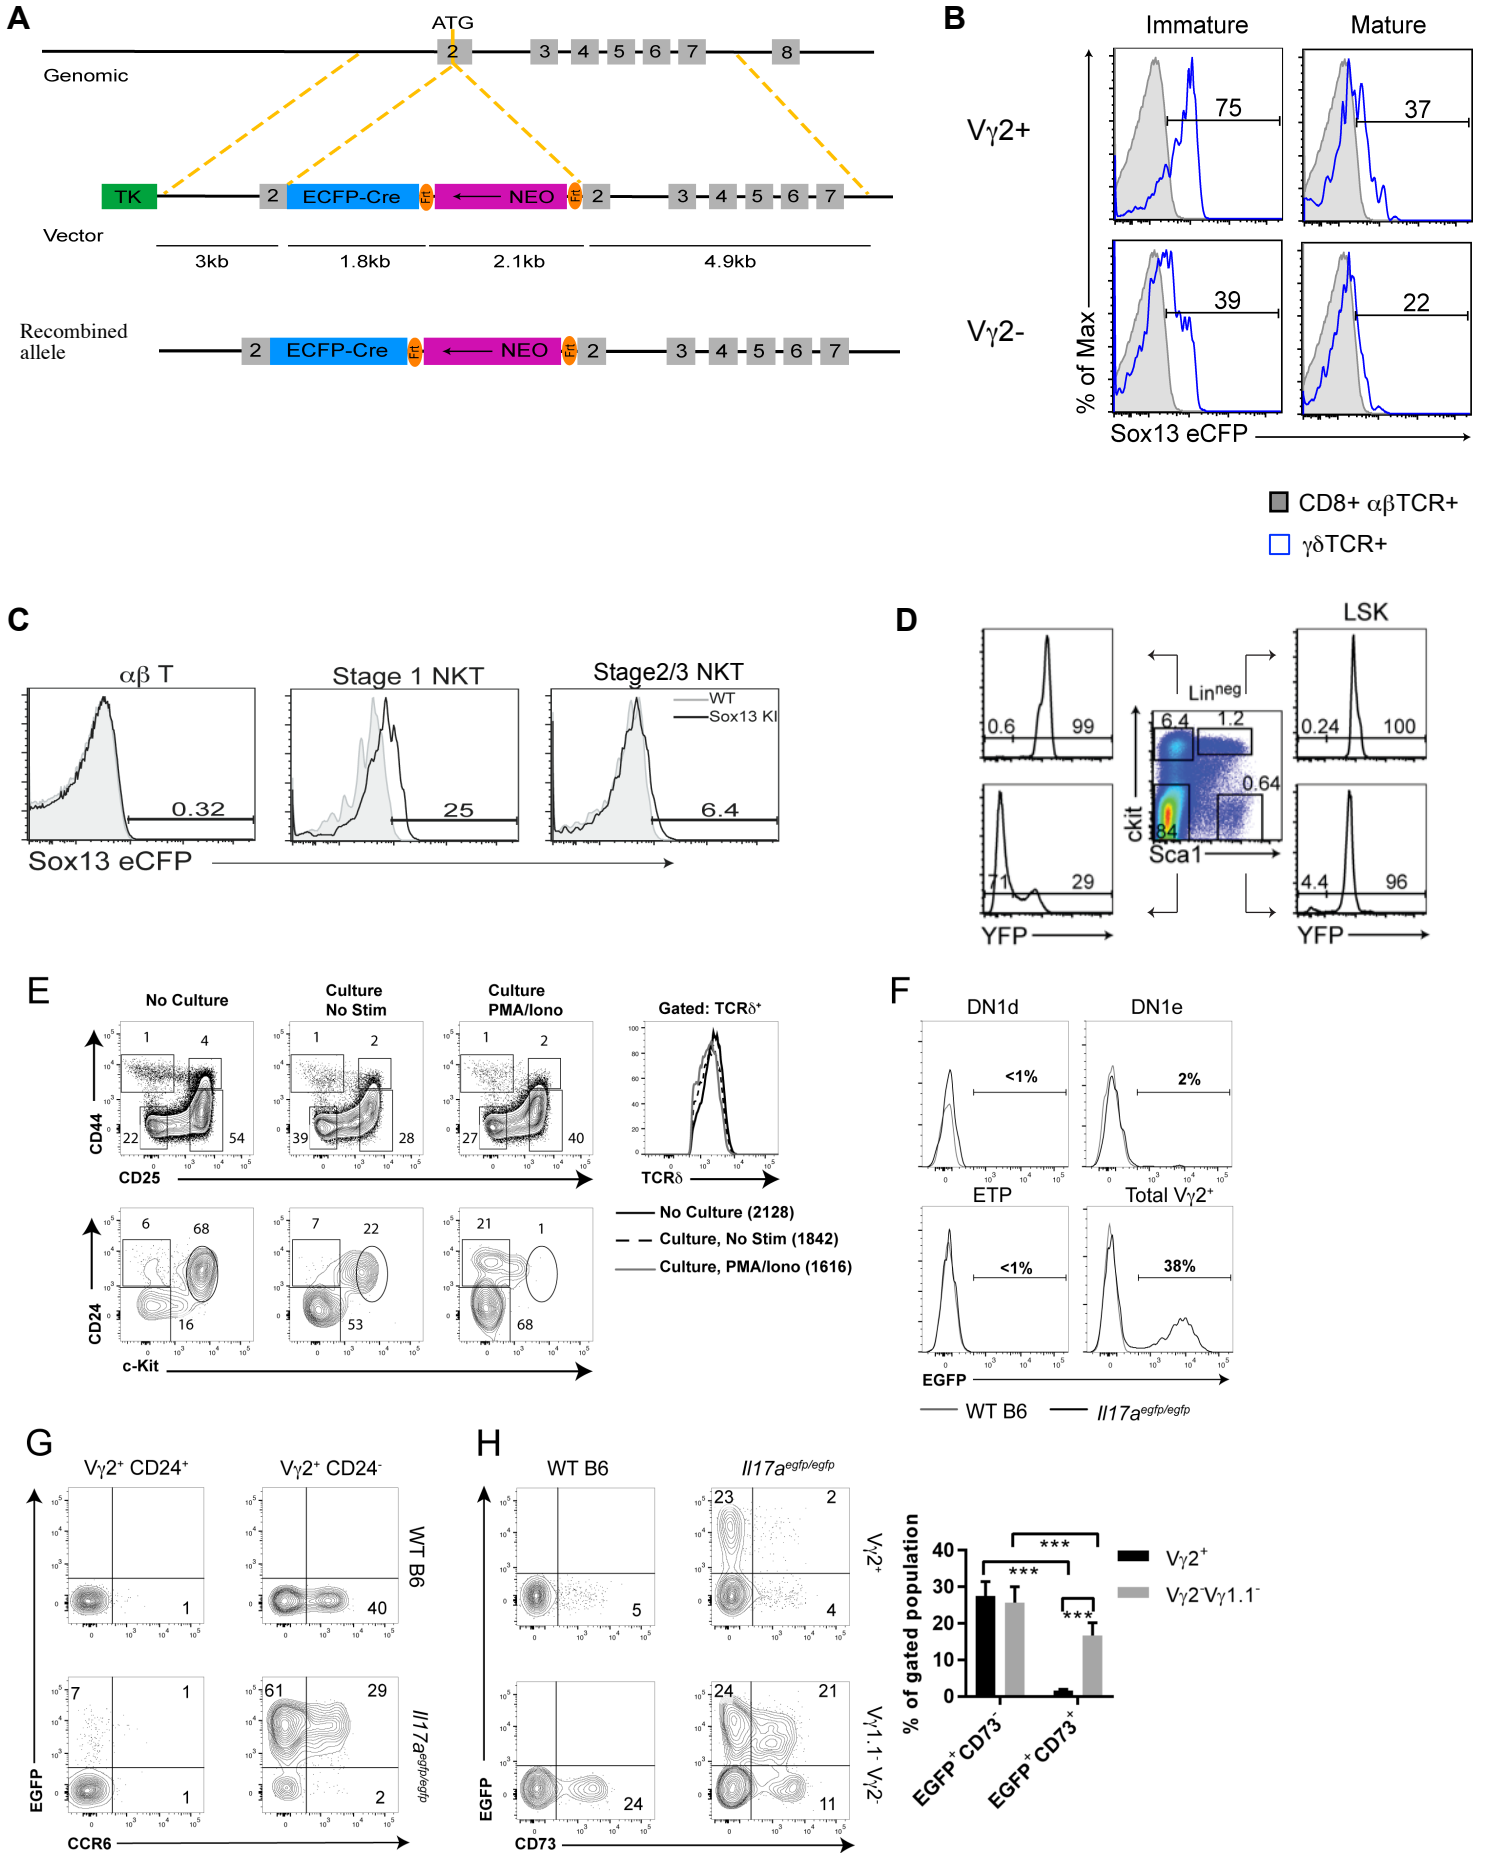

**Figure S1. Related to Figure 1 and Figure 2. In the thymus, only innate lymphoid effectors and DN1 precursors express *Sox13*, while only  $\gamma\delta$  cells express *Il17a*-EGFP. (A)** *Sox13* locus modified by a “knock-in” reporter-Cre fusion construct by homologous recombination in AB1 ES (129 background) cells. The drug resistance gene (*neo*) used to positively select clones with the vector insertion was removed by Flp recombinase targeting Frt sites prior to blastocyst injections. Numbers in boxes represent exons. The knock-in allele cannot produce normal SOX13. *Sox13*<sup>+/-</sup> mice have no significant alterations in T $\gamma\delta$ 17 cell differentiation. TK, thymidine kinase, a negative selection marker. **(B)** Reporter expression in  $\gamma\delta$ TCR<sup>+</sup> thymocytes confirms the highest *Sox13* expression in immature (CD24<sup>+</sup>) V $\gamma$ 2<sup>+</sup> T cells. *Sox13* expression is extinguished upon effector T cell maturation as previously reported. **(C)** Reporter expression in  $\alpha\beta$ TCR<sup>+</sup> thymocytes confirms that *Sox13* is not expressed in developing  $\alpha\beta$  T cells, except in early CD44-NK1.1-CD1d: $\alpha$ GalCer tetramer<sup>+</sup> (stage 1) V $\alpha$ 14<sup>+</sup> invariant NKT cells, confirming published data (Cohen et al., 2013). **(D)** To determine the developmental onset of *Sox13* expression in hematopoietic cells *Sox13* reporter mice, in which the reporter is a fusion protein of ECFP and CRE recombinase, was crossed to the ROSA-YFP Cre reporter mouse line. In this model, progenitors that first express *Sox13* and all their descendants will be YFP<sup>+</sup>, irrespective of whether differentiated cells continue to express *Sox13* or not. All long-term repopulating bone marrow hematopoietic stem cells (Lin-Sca1<sup>+</sup>c-Kit<sup>+</sup>, LSK) were YFP<sup>+</sup>, indicating that during hematopoiesis *Sox13* is first expressed in LSKs. By transcriptome analysis and ECFP expression in the reporter strain, *Sox13* is largely turned off in most lineage committed progenitors such as LMPPs and CLPs (data not shown), only to be reinduced in DN1 thymocytes. **(E)** Instability of DN1 cells after *in vitro* PMA/Ionomycin stimulation for ICS. Ex vivo thymocytes from 1wk old mice (not cultured) or cultured as indicated for 2-3h and then analyzed via FACS. CD24 and c-Kit staining of DN1 cells is significantly altered after PMA/Iono stimulation, and TCR $\delta$  is down regulated on  $\gamma\delta$  thymocytes (TCR $\delta$  MFI indicated in parentheses). **(F)** Neonatal DN1d, DN1e, and ETPs and V $\gamma$ 2<sup>+</sup>  $\gamma\delta$  thymocytes were analyzed for EGFP (driven by an IRES inserted immediately after the *Il17a* stop codon) expression via FACS. The same cell population of WT B6 mice was used to establish EGFP channel background fluorescence. **(G)** V $\gamma$ 2<sup>+</sup>  $\gamma\delta$  thymocytes were gated into immature (CD24<sup>+</sup>) and mature (CD24<sup>-</sup>) populations, and *Il17a-egfp* reporter and CCR6 expression was assessed. *Il17a* transcriptional activity is first observed in immature cells, and is highly active in mature cells including many that have yet to express detectable surface CCR6 protein. **(H)** V $\gamma$ 2<sup>+</sup> and V $\gamma$ 1.1<sup>-</sup>V $\gamma$ 2<sup>-</sup> (mostly V $\gamma$ 4<sup>+</sup> in early post-natal mice)  $\gamma\delta$  thymocytes were analyzed

for expression of *Il17a-egfp* and CD73, which has been proposed to be induced by  $\gamma\delta$ TCR signaling and upregulated prior to  $\gamma\delta$  effector lineage commitment. Greater than 90% of *Il17a-egfp*<sup>+</sup> V $\gamma$ 2<sup>+</sup> cells do not express CD73, suggesting minimal involvement of TCR signaling in establishing *Il17a* transcriptional capacity. Data are representative of 6 animals (2 independent experiments) analyzed at 5-7 d after birth. \*\*\* p<.001 by two-way ANOVA with Sidak's multiple comparisons test.

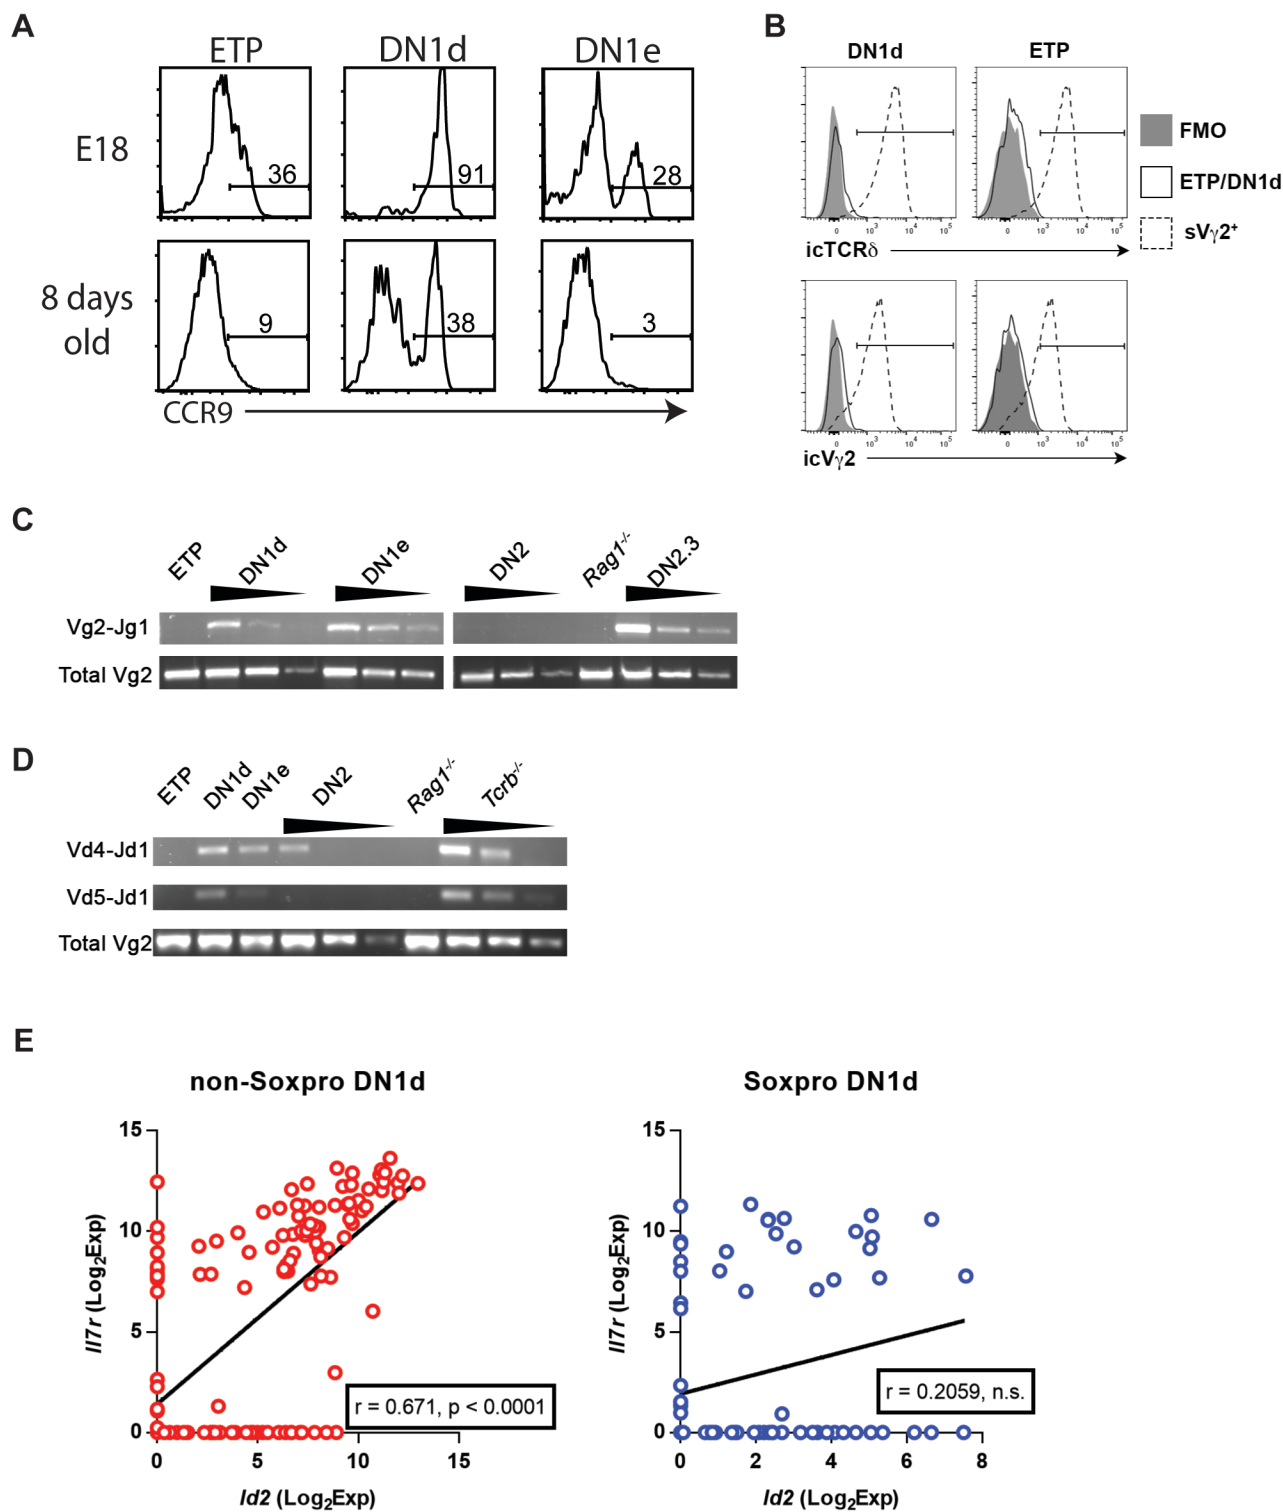

**Figure S2. Related to Figure 3. Markers delineating heterogeneity among DN1d cells and TCR gene rearrangement status in DN1 progenitors. (A)** Thymocyte progenitors at the indicated age were analyzed for expression of CCR9, a marker identified as highly enriched in Soxpro versus non-Soxpro DN1d cells. **(B)** DN1d cells do not express intracellular TCR $\gamma$  and  $\delta$  chains. Cells were surface stained with Ab cocktails to identify  $\gamma\delta$  T cells and DN1 subsets and then fixed and permeabilized and stained for intracellular (ic) TCR $\delta$  (top panels) or V $\gamma$ 2

(bottom panels). Gray filled, fluorescence minus one (FMO) control; Solid histogram, indicated population stained for icTCR; Dashed histogram, icTCR expression in surface V $\gamma$ 2 TCR $^+$   $\gamma\delta$  T cells, overlaid as a positive control. Data are representative of samples from one of six mice analyzed in two independent experiments. **(C-D)** Partial rearrangement of TCR $\gamma$  and  $\delta$  genes in DN1d cells. Genomic DNA was isolated from thymic progenitors or control cells and PCR performed to detect **(C)** V $\gamma$ 2-J $\gamma$ 1 or **(D)** V $\delta$ 4-J $\delta$ 1 and V $\delta$ 5-J $\delta$ 1 gene rearrangements. Lanes were loaded with 2000 cell equivalents or where indicated (filled triangles), with serial 4-fold dilutions starting at 2000 cell equivalents. *Rag1* $^{-/-}$  and *Tcrb* $^{-/-}$  total thymocytes or DN2.3 cell line (V $\gamma$ 2-J $\gamma$ 1 rearranged) were used as negative and positive controls, respectively. Total unrearranged V $\gamma$ 2 gene segment was used as an internal control for all reactions. DN1d cells exhibit ~25% of rearrangement detected in the V $\gamma$ 2 $^+$  DN2.3  $\gamma\delta$  T cell line, with similar extents of V $\delta$ 4 and V $\delta$ 5 rearrangements (compared to thymocytes of *Tcrb* $^{-/-}$  mice). Low levels (<10% of the extent found in thymocytes of *Tcrb* $^{-/-}$  mice) of V $\gamma$ 1.1-J $\gamma$ 4 rearrangements are observed in DN1d cells (data not shown). DN2 thymocytes showed only V $\delta$ 4 gene rearrangements while TCR  $\gamma$  or  $\delta$  gene rearrangements were undetectable in ETPs, as expected. **(E)** Correlation of *Id2* and *Il7r* expression in single DN1d cells. Soxpro and non-Soxpro DN1d cells were segregated as in **Figure 3**, and expression of the indicated genes critical for innate lymphoid cell (ILC) development plotted for each cell. Data suggest that some non-Soxpro DN1d cells may retain ILC developmental potential while *Id2* expression is relatively low in “Soxpro” cluster. Inset lines were calculated by least squares fit and correlation values and significance measures determined by Spearman correlation using GraphPad Prism.

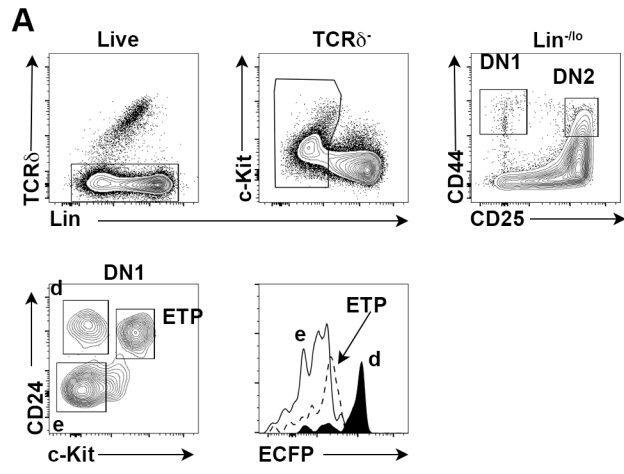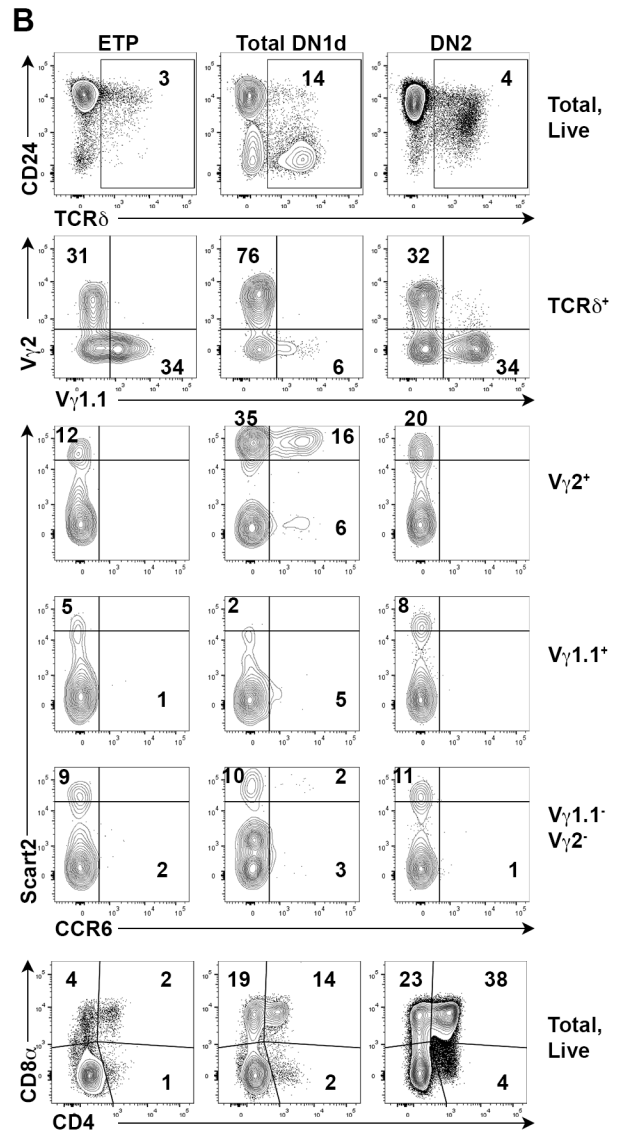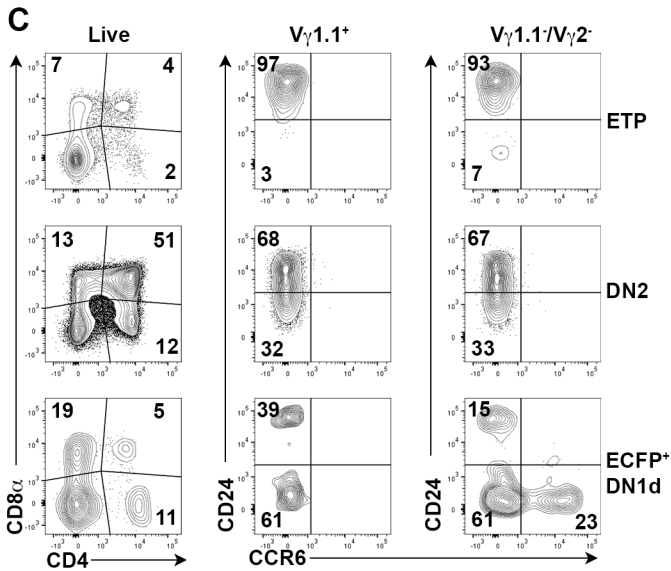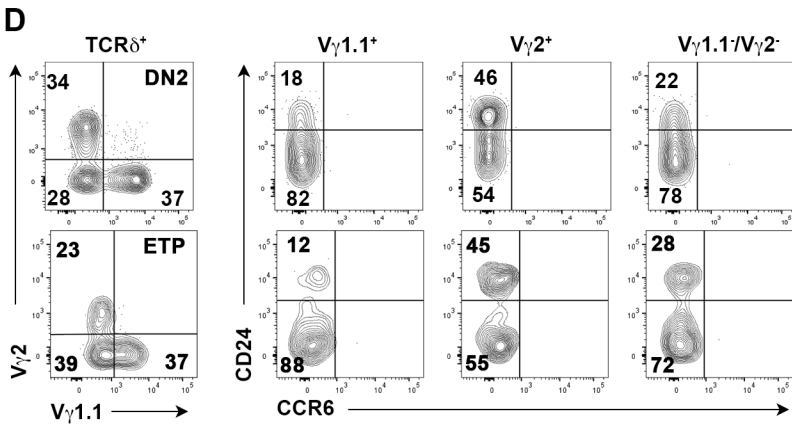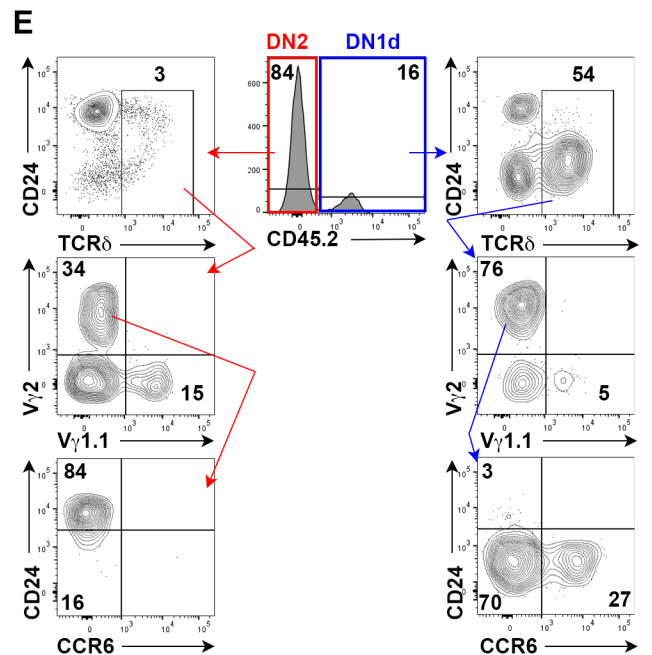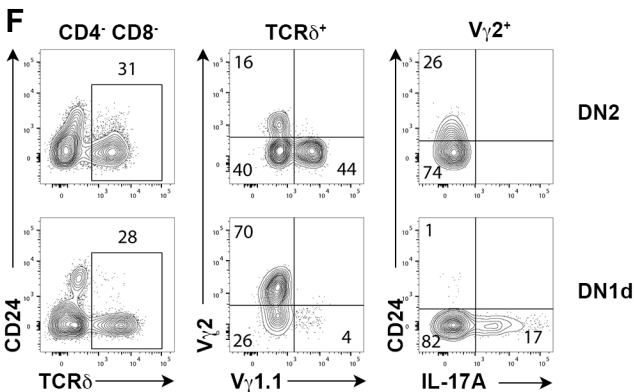

**Figure S3. Related to Figure 4. Developmental potential of DN1d cells in hFTOC.** (A) Representative gating strategy for sorting DN subsets from *Sox13<sup>ECFP/+</sup>* knock-in mice for hFTOC. Sox13-ECFP was detected and the positive fraction sorted on a FACS Aria. Total, live cells were first gated strictly on TCR $\delta$ <sup>-</sup>, then on cells that include those expressing low levels of Lin markers (Materials and Methods). Lin<sup>-/lo</sup> were segregated based on CD25 and CD44 expression into four classical DN subsets, with DN1 and DN2 cells containing T cell progenitors. DN1 cells were further stratified into ETP, DN1d, and DN1e subsets based on c-Kit and CD24 expression. Note that ECFP fluorescence intensity is significantly higher in DN1d cells using the FACS Aria “enhanced ECFP detection” (Materials and Methods) in comparison to the conventional analytic cytometer LSRII, but there still exist ~10% of DN1d cells not expressing the reporter in 10 day old mice. (B) Development of “total” DN1d cells (not sorted for ECFP<sup>+</sup> cells, in contrast to **Figure 4A**) in hFTOC. A lymphoid fetal thymi were repopulated with the indicated progenitor population from WT B6 mice and then cultured for 8 days prior to analysis. Shown are generative capacities of different progenitors for T $\gamma\delta$ 17 phenotype cells (CCR6<sup>+</sup>Scart2<sup>+</sup>) among  $\gamma\delta$  T subtypes defined by expression of different TCR $\gamma$  chains. CD4<sup>+</sup>CD8<sup>+</sup> double positive (DP) thymocytes can be generated from Soxpro cells but they are distinct from the corresponding cells from conventional T cell progenitors, with some expressing Scart2 that is not found on normal DP cells (not shown). (C) DP and other  $\gamma\delta$  T cell subset development from ECFP<sup>+</sup> DN1d cells. Progenitors were sorted and hFTOC performed as above. DP generation is more restricted from ECFP<sup>+</sup> DN1d (compare to **Figure S3B** assay using total DN1d cells), suggesting that some of the  $\alpha\beta$  T cell potential may be present in the ECFP<sup>-</sup> DN1d fraction. Paucity of ECFP<sup>-</sup> DN1d cells precluded direct development hFTOC assays of these cells. CCR6<sup>+</sup> V $\gamma$ 4<sup>+</sup> (V $\gamma$ 1.1<sup>-</sup>/V $\gamma$ 2<sup>-</sup>) thymocytes are also generated from ECFP<sup>+</sup> DN1d cells while ETP or DN2 did not generate CCR6<sup>+</sup> V $\gamma$ 4 T $\gamma\delta$ 17 cells. (D) Extended duration of DN2 or ETP cell hFTOC do not alter developmental outcomes. To determine whether DN2 or ETP cells can generate T $\gamma\delta$ 17 cells with a delayed kinetic compared to DN1d cells, DN2 and ETP progenitors from WT neonatal (d7) B6 mice were assayed in hFTOC after up to 3wk in culture. TCRV $\gamma$  usage is comparable to early culture days (compare to **Figure S3B**) and most cells have matured as indicated by CD24 downregulation, but no CCR6<sup>+</sup> cells are observed. (E) DN1d cells were sorted from WT B6 (CD45.2<sup>+</sup>) mice and DN2 cells were sorted from CD45.1<sup>+</sup> B6 congenic mice, mixed at equal numbers, and then used to repopulate lymphoid fetal thymic lobes. Repopulated lobes were cultured under hFTOC conditions for 1wk prior to analysis. Data are representative of 2 independent experiments. (F) CD24 by TCR $\delta$  staining of Live/CD4<sup>+</sup>

/CD8<sup>-</sup> cells, V $\gamma$  chain analysis of TCR $\delta$ <sup>+</sup> cells, and CD24 by IL-17A analysis of V $\gamma$ 2<sup>+</sup> cells from the same experiment shown in **Figure 4B**. Note that some CD24 downregulation is observed following PMA/Ionomycin stimulation (compare vs. **Figure 4A**, **Figure S3C**).



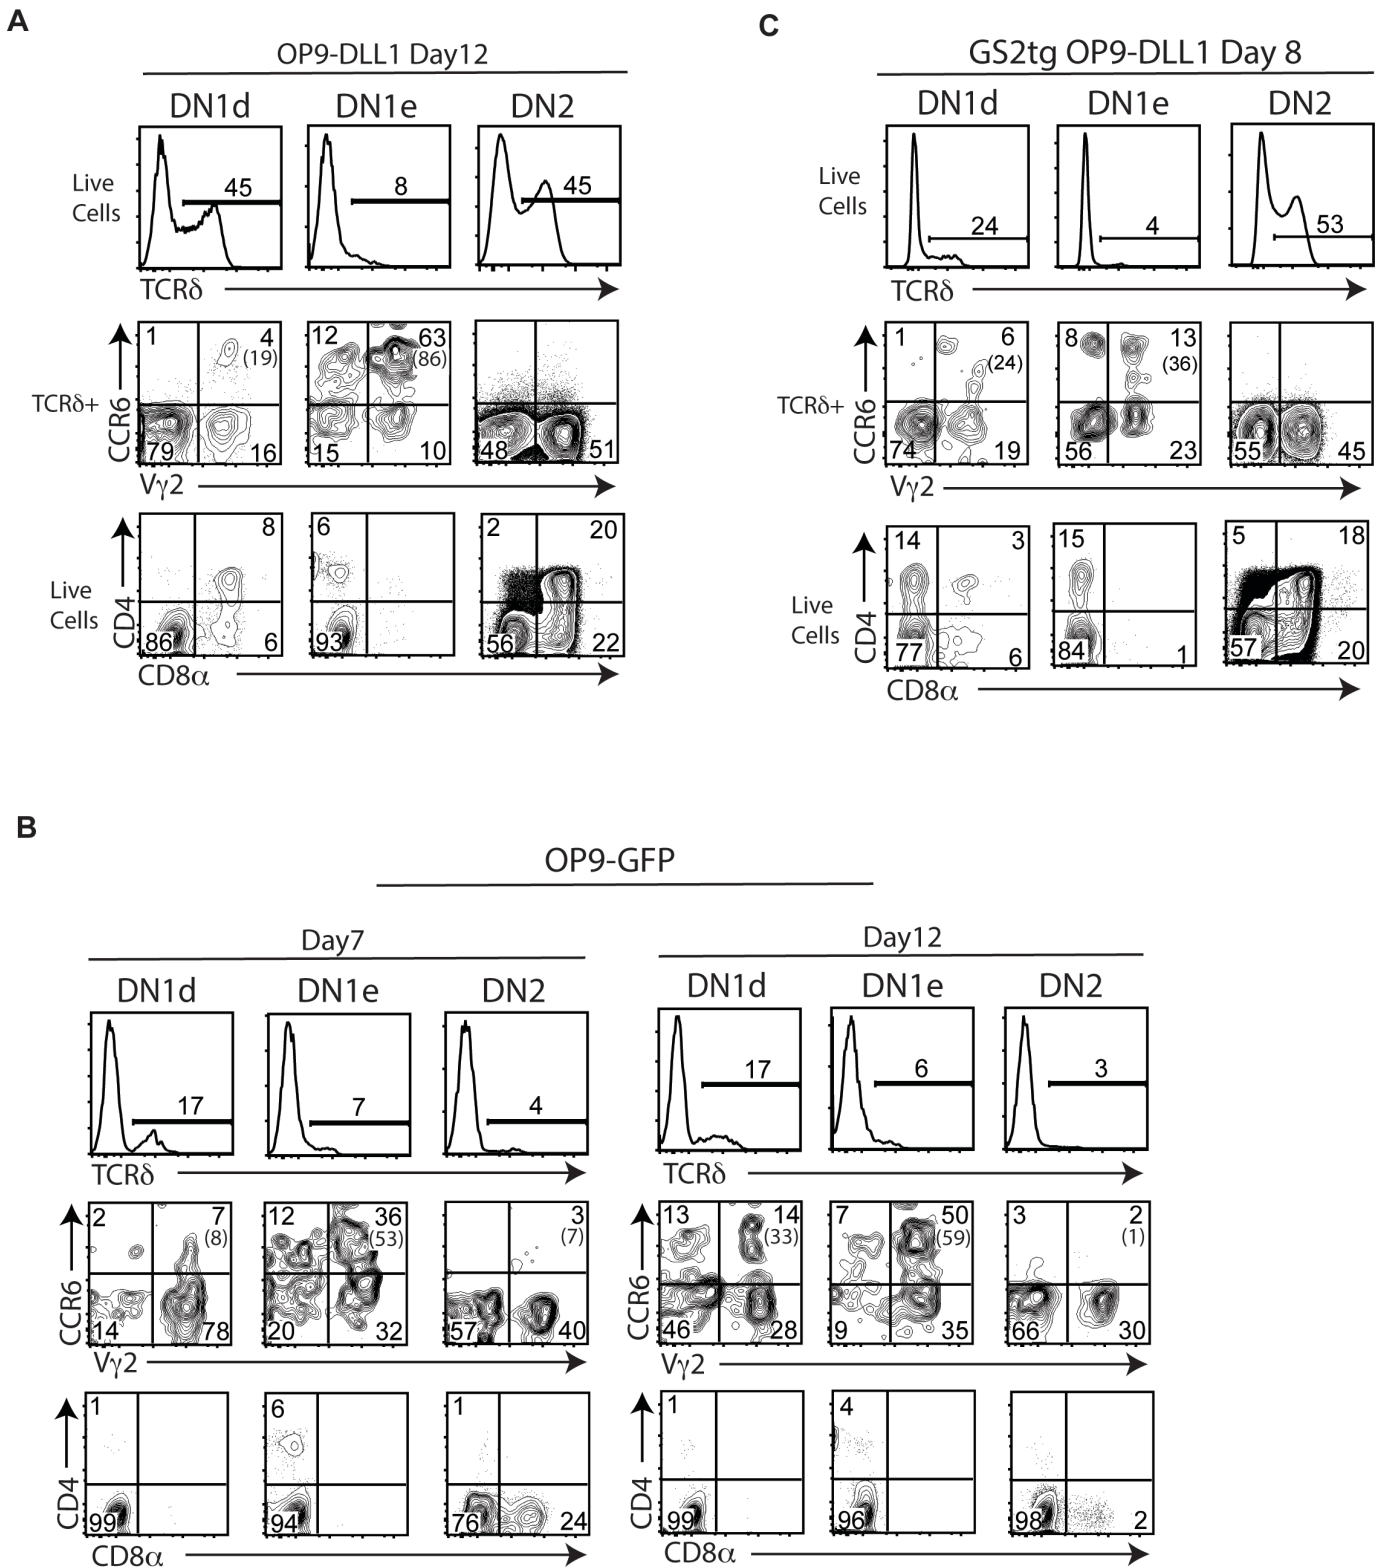

**Figure S4. Related to Figure 4. Characteristics of  $\gamma\delta$  T cells generated *in vitro* from T precursor cell subsets.**

(A) T $\gamma\delta$ 17 cells generated from DN1d and DN1e cells are observed at longer-term cultures on OP9-DLL1 stroma. Shown is a longer duration of culture (day 12) of experiments of **Figure 4C**. , Inset parenthetical value in CCR6 $^{+}$ V $\gamma$ 2 $^{+}$  quadrant indicates percent of CCR6 $^{+}$  cells among V $\gamma$ 2 $^{+}$  cells (also for panel C). (B) T $\gamma\delta$ 17 cells are

generated from DN1d and DN1e cells on OP9 cells without DLLs. Shown are representative cultures analyzed at day 7 and day 12 of indicated precursor subsets from *Tcrb*<sup>-/-</sup> mice. DP thymocytes are not generated/maintained and DN2 proT cells are significantly impaired in generating  $\gamma\delta$  T cells (compare to A) when Notch signaling is absent in culture. (C) Provision of rearranged TCR $\gamma$  chain gene in developing T precursor subsets enhance the generation of T $\gamma\delta$ 17 cells. Shown are analyses of OP9-DLL4 cultures at two time points initially seeded with sorted DN1d cells, DN1e cells, or DN2 proT cells from G8 TCR $\gamma$  transgenic mice (Kang et al., 1998). By day 12, >70% of V $\gamma$ 2<sup>+</sup> cells express CCR6 whereas DN2 proT cells do not differentiate into T $\gamma\delta$ 17 cells.

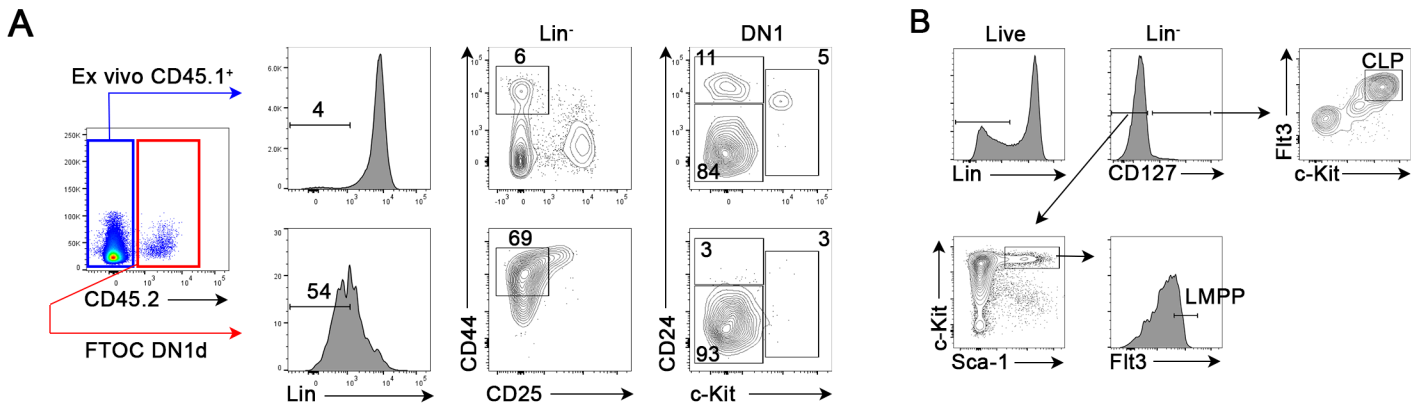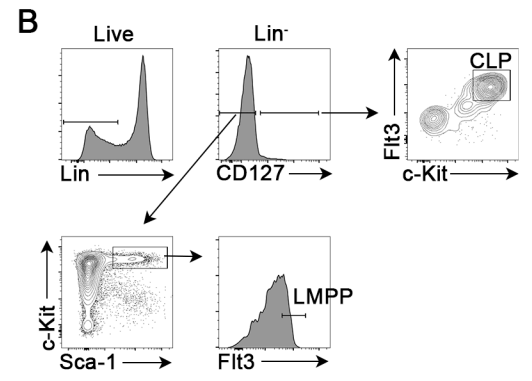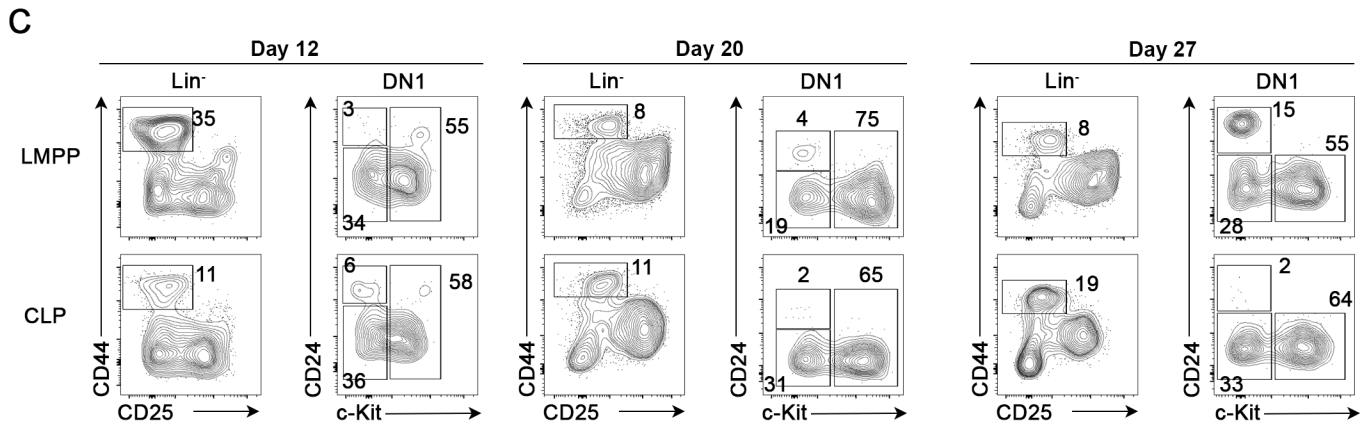

**D FTOC 2wk**

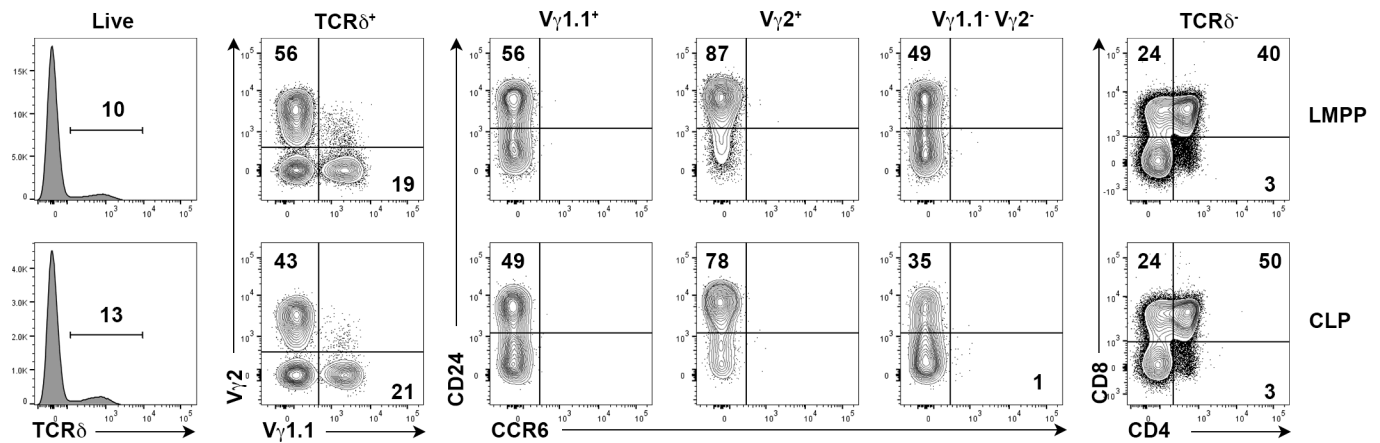

**E FTOC 4wk**

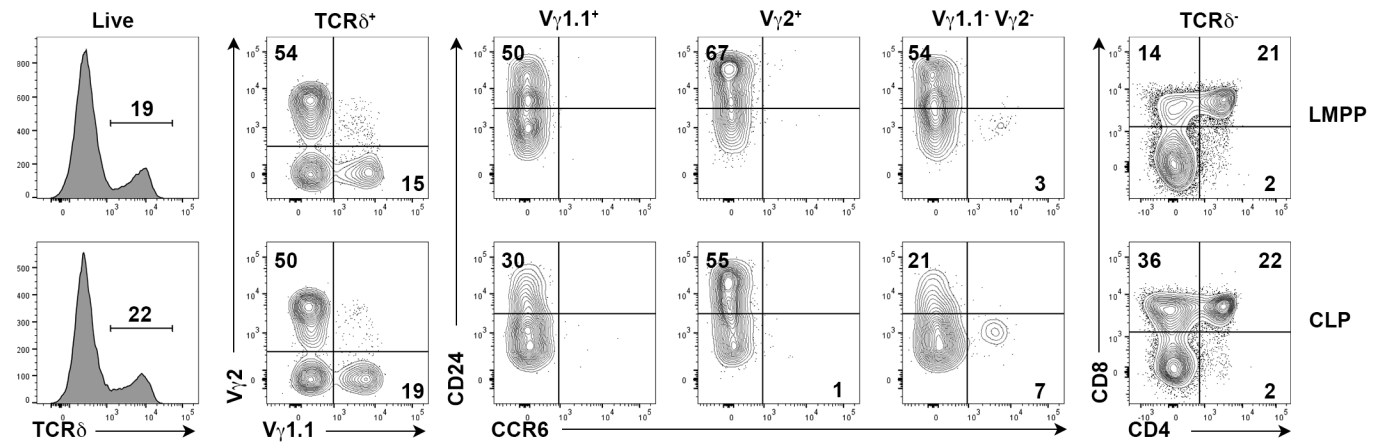

**Figure S5. Related to Figure 4. Development of fetal liver LMPP and CLP in hFTOC. (A)** Analysis of DN1d potential to develop into DN1e cells. DN1d cells were sorted from thymuses of 7-10d old WT B6 and used to repopulate alymphoid fetal thymic lobes. Lobes were then cultured under hFTOC conditions for 3d prior to analysis. As described in *Materials and Methods*, hFTOC cells were mixed with  $1 \times 10^6$  thymocytes from 4wk old CD45.1<sup>+</sup> B6 congenic mice to facilitate gating. **(B)** Gating scheme for sorting LMPP and CLP from fetal liver. Red blood cell-depleted fetal liver cells were labeled with the indicated Ab for cell sorting. Live (7-AAD<sup>-</sup>) cells were first gated on Lin<sup>-</sup> (Lin = CD3 $\epsilon$ /CD4/CD8 $\alpha$ /CD19/B220/Gr-1/Ter-119, notably CD11b is *not* included in the Lin cocktail for fetal progenitors) and then on CD127<sup>+/+</sup>. Common lymphoid progenitors (CLP) were sorted as CD127<sup>+</sup>/Flt3<sup>hi</sup>/c-Kit<sup>hi</sup>. CD127<sup>-</sup> cells were gated on Sca-1<sup>+</sup>/c-Kit<sup>hi</sup>, and then lymphoid-primed multipotent progenitors (LMPP) were selected as those cells exhibiting the highest 25% of Flt3 expression. **(C)** DN subset analysis throughout CLP/LMPP hFTOC culture. While DN1 cells were present throughout the culture, DN1d-like cells were more variable. CLP generated a small number of CD24<sup>+</sup>/c-Kit<sup>-</sup> DN1d-like cells by Day 12, but these cells were not maintained through Day 20 or 27. In contrast, LMPP did not generate a distinct population of CD24<sup>+</sup>/c-Kit<sup>-</sup> DN1d-like cells until Day 20, but these cells were further enriched by Day 27. **(D-E)** Analysis of  $\gamma\delta$  cells developing in hFTOC lobes repopulated with LMPP or CLP 2 wk **(D)** or 4 wk **(E)** after cultures were established.

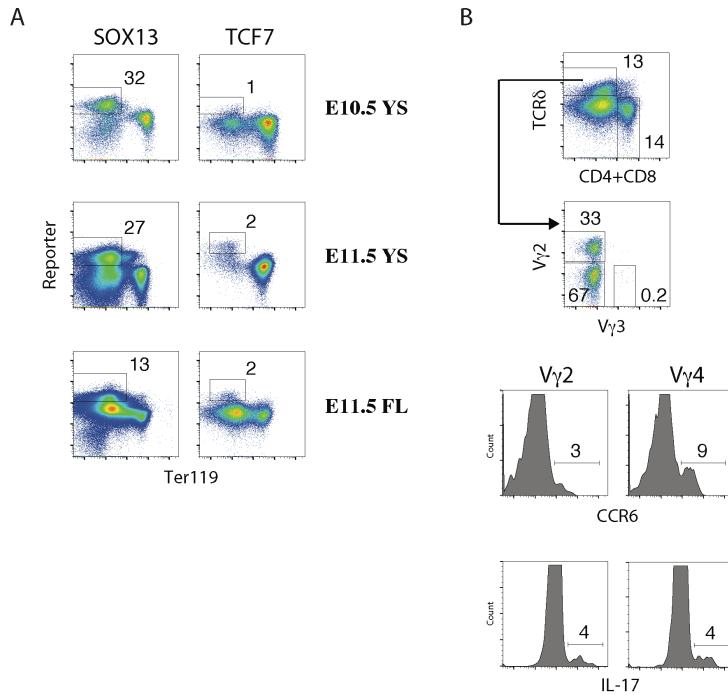

**Figure S6. Related to Figure 4. Evidence for potential generation of T $\gamma\delta$ 17 cells from embryonic yolk sac progenitors.** **(A)** *Sox13-EGFP* and *Tcf7-EGFP* reporter expression in non-erythroid cells (Ter119<sup>neg</sup>) at E10.5 and E11.5 yolk sac (YS) compared to E11.5 fetal liver (FL) cells. ECFP expression is based on intracellular staining (ICS) with anti-CFP antibody as many cells expressed low amounts of the reporter that were not reliably detected by non-ICS FACS. Representatives of five and two experiments for *Sox13* and *Tcf7*, respectively. Note that the ICS protocol removes the majority of Ter119<sup>+</sup> cells. **(B)** *YS cells are highly biased to generate T $\gamma\delta$ 17 thymocytes in FTOCs.* Cells from FTOCs reconstituted with E10.5 YS cells were analyzed for T $\gamma\delta$ 17 cells and IL-17 production. E10.5 total YS cells were primed on OP9-DL1 stroma then used to reconstitute alymphoid E14.5 fetal thymuses in hanging drop cultures for 1 day followed by conventional FTOCs with IL-7 supplemented media for 16-21 days. IL-17 ICS was performed after the standard PMA/Ionomycin stimulation for 2hrs. Shown are TCR $\delta$ <sup>+</sup> and CD4 and/or CD8 expressing cells (Top), V $\gamma$ 2<sup>+</sup> and V $\gamma$ 3<sup>+</sup> cells amongst  $\gamma\delta$ TCR<sup>+</sup> thymocytes (middle), followed by histograms depicting CCR6<sup>+</sup> cells amongst V $\gamma$ 2<sup>+</sup> and V $\gamma$ 4<sup>+</sup> cells (T $\gamma\delta$ 17 cells) and IL-17 production from the same cells. V $\gamma$ 4<sup>+</sup> cells are identified as V $\gamma$ 2/3/1.1<sup>neg</sup> cells. Remarkably, YS cells generated near exclusively the  $\gamma$ TCR repertoire associated with T $\gamma\delta$ 17 cells, as there were negligible fetal V $\gamma$ 3<sup>+</sup> and neonatal V $\gamma$ 1.1<sup>+</sup> cells generated from these embryonic cells in FTOCs (compare to **Figure 4**, **Figure S5**, **Figure S7**). Data are from one of three experiments with pooled lobes (6 or 10 combined).

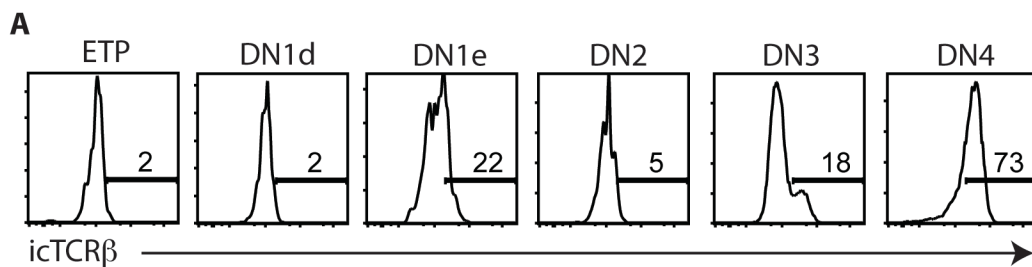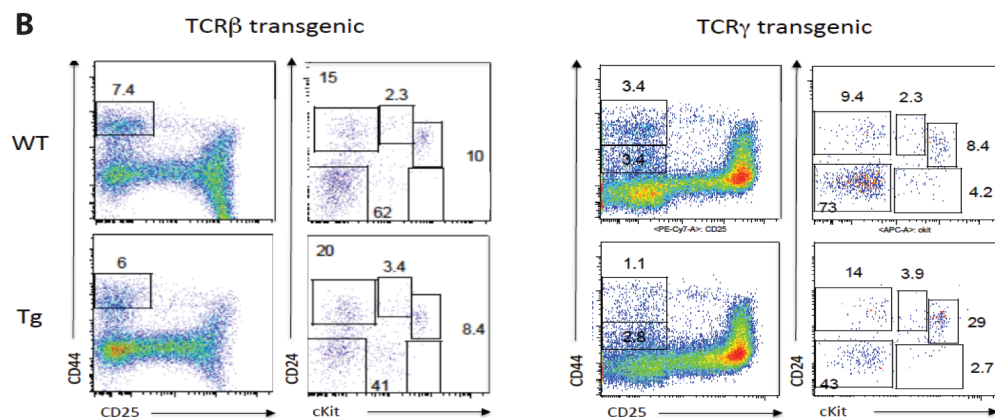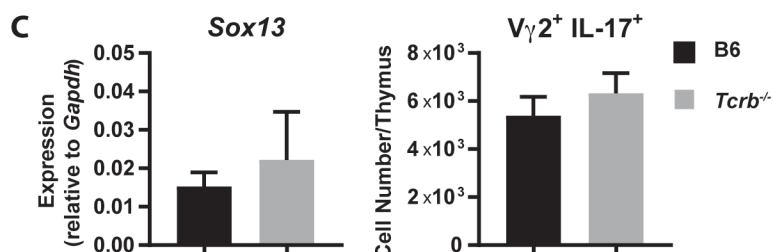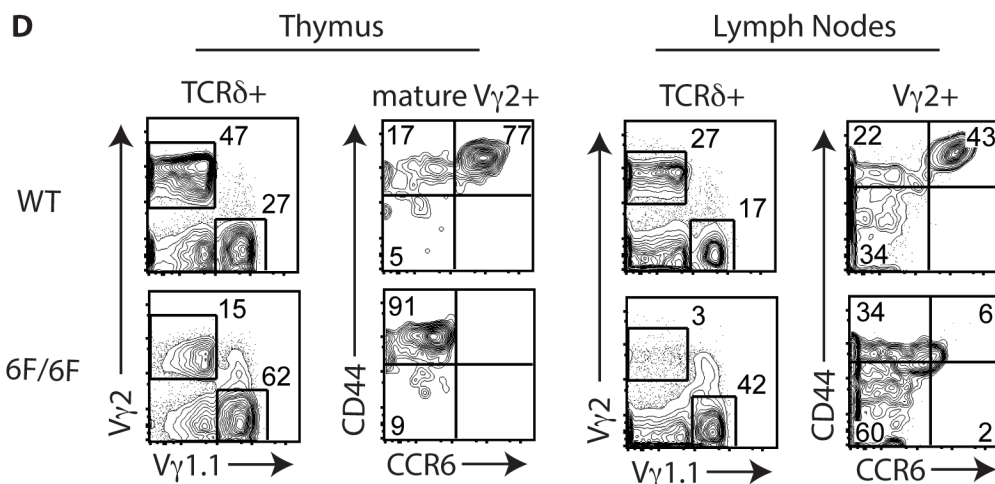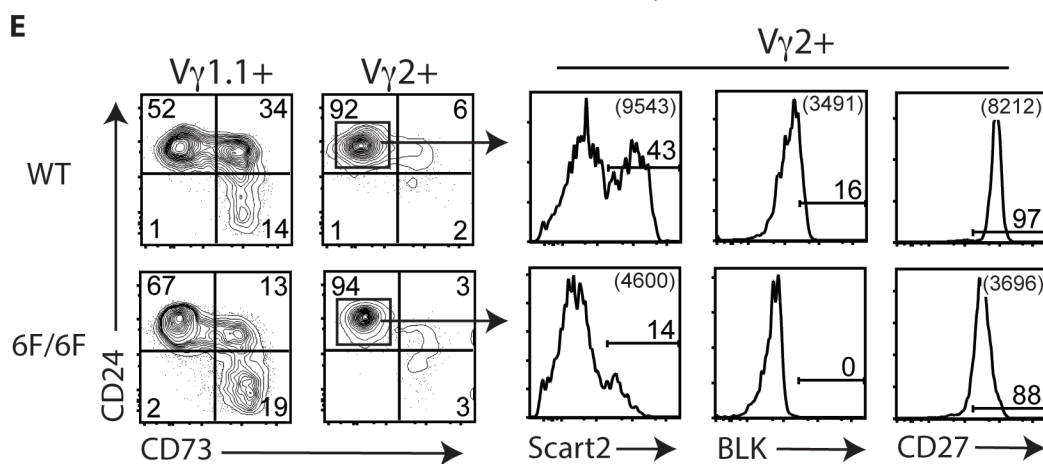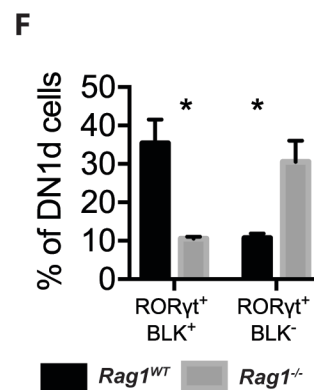

**Figure S7. Related to Figure 5. Ectopic TCR expression or TCR signaling deficiency does not impact DN1d progenitor frequency.** (A) Intracellular (ic) expression of TCR $\beta$  chain in indicated DN subsets of WT B6 mice showing that DN1d cells have not assembled full length TCR $\beta$  chain, consistent with previous studies that have shown that DN1d cells have not rearranged *Tcrb* gene segments. (B) DN and DN1 subset distributions in TCR $\beta$  (LN3b, (Serwold et al., 2007)) and TCR $\gamma$  (GS2tg) transgenic mice show that DN1d cells are present under conditions of ectopically early expression of the indicated TCR chain. In the models, rearranged TCR $\beta$  and TCR $\gamma$  genes are expressed under the control of endogenous regulatory elements and most DN1 cells express the supplied TCRs (icTCR $\beta$  (Serwold et al., 2007) and TCR $\gamma$  transcript assays, data not shown). DN1d cells do not express preT $\alpha$  chain (*Ptcra*, RNAseq) and thus do not have the potential to generate preTCR. (C) Quantitative PCR analysis of *Sox13* expression by DN1d from WT B6 and *Tcrb*<sup>-/-</sup> mice (left graph, n=5/genotype) and V $\gamma$ 2<sup>+</sup> IL-17<sup>+</sup> cell numbers in the thymus of WT B6 and *Tcrb*<sup>-/-</sup> mice (right graph, n=3/genotype). Analyses were performed at 7-10d of age. (D) Analysis of thymic and skin-draining lymph node  $\gamma\delta$  T cells in WT B6 and 6F/6F mice. TCRV $\gamma$  usage is abnormally skewed in 6F/6F mice, leading to a near absence of T $\gamma\delta$ 17 (CD44<sup>+</sup>CCR6<sup>+</sup>) cells in both the thymus and lymph nodes. (E) The indicated subsets of  $\gamma\delta$  thymocytes from WT B6 or 6F/6F mice were analyzed first for CD73 expression among mature and immature populations, and then for Scart2, BLK, and CD27 expression by the CD24<sup>+</sup>CD73<sup>-</sup> population. Numbers in brackets represent mean fluorescence intensity (MFI). Prior to CD73 induction, expression of all tracked cell surface antigen is impaired when TCR signaling is compromised. (F) Summary of all mice analyzed as in **Figure 5F**. B6 n=20, *Rag1*<sup>-/-</sup> n=14. \*, p<.05 by two-way ANOVA.

## Supplementary Tables

**Table S1. Related to Figure 2. Differentially expressed genes (DEGs) between neonatal DN1d and ImmV2 subsets.** A complete list of genes (ordered by fold change) whose expression (in RPKM count) is changed 2-fold or more ( $p \leq 0.05$ ) between DN1d versus immature ( $CD24^{hi}$ )  $V\gamma 2^+$  thymocytes (ImmV2). Each column represents an independently sorted replicate for indicated subsets.

**Table S2. Related to Figure 2. Differentially expressed genes between neonatal DN1d and DN1ab subsets.** A complete list of genes (ordered by fold change) whose expression (in RPKM count) is changed 2-fold or more ( $p \leq 0.05$ ) between DN1d versus DN1ab (ETPs).

**Table S3. Related to Figure 2. Differentially expressed genes between neonatal DN1d and DN1e subsets.** A complete list of genes (ordered by fold change) whose expression (in RPKM count) is changed 2-fold or more ( $p \leq 0.05$ ) between DN1d versus DN1e.

**Table S4. Related to Figure 2. Differentially expressed transcription factors (TFs) across DN1ab, DN1d, DN1e and ImmV2 subsets.** A complete list of TFs whose expression (in RPKM count) is changed 2-fold or more ( $p \leq 0.01$ ) in pairwise comparisons among DN1ab, DN1d, DN1e and ImmV2 thymocytes. Heat maps representing this cluster is shown in Fig 2b. Gene expression values in DN1 cells segregated on c-Kit expression only (DN1  $ckit^+$ ), DN2 and DN4 cells are also shown for comparison.



| <b>Target</b>  | <b>Forward</b>            | <b>Reverse</b>           | <b>Application</b> |
|----------------|---------------------------|--------------------------|--------------------|
| <i>Bcl11b</i>  | CTGGGGGACAGCAATCCTTTC     | TGTGGGTCCAAGTGATGGC      | sc                 |
| <i>Bhlhe40</i> | ACGGAGACCTGTCAGGGATG      | GGCAGTTTGTAAAGTTTCCTTGC  | sc                 |
| <i>Blk</i>     | CGTTCCTACCCAGGAATGA       | AAGTCCTCCAACACCGACTG     | sc                 |
| <i>Ccr9</i>    | ATCTCTGGTCTGCCTTTGCC      | TGCCAGGAATAAAGGCTTGTGA   | sc                 |
| <i>Cd163l1</i> | CTGGCCTCTGAGTTTtagggTC    | CCCTTGGTGTCGAACCAGC      | sc                 |
| <i>Cdh1</i>    | CAGGTCTCCTCATGGCTTTGC     | CTTCCGAAAAGAAGGCTGTCC    | sc                 |
| <i>Cdk6</i>    | GGCGTACCCACAGAAACCATA     | AGGTAAGGGCCATCTGAAAAC    | sc                 |
| <i>Cpa3</i>    | AATTGCTCCTGTCCACTTTGAC    | TCACTAACTCGGAAATCCACAGT  | sc                 |
| <i>Csf1r</i>   | GAGCCTACCAGAAGACCCAC      | GCAGGTTAGCATAGTCCTGGTC   | sc                 |
| <i>Csf2rb2</i> | TCCAGCCAGATCGTGACCT       | AATCCCAAGAGATACACTCCA    | sc                 |
| <i>Dna2</i>    | GGGTGGAGCTACTTCGGAAGA     | CTCCTCGGCTCAGAACTGTCT    | sc                 |
| <i>E2f2</i>    | ACGGCGCAACCTACAAAGAG      | GTCTGCGTGTAAGCGAAGT      | sc                 |
| <i>Egr2</i>    | GTGGCGGGAGATGGCATGAT      | CACCAGGGTACTGTGGGTCA     | sc                 |
| <i>Ets1</i>    | CTACGGTATCGAGCATGCTCAGTG  | AAGGTGTCTGTCTGGAGAGGGTCC | sc                 |
| <i>Etv5</i>    | TCAGTCTGATAACTTGGTGCTTC   | GGCTTCCTATCGTAGGCACAA    | sc                 |
| <i>Gapdh</i>   | AGGTCGGTGTGAACGGATTTG     | TGTAGACCATGTAGTTGAGGTCA  | sc, q              |
| <i>Gata3</i>   | CTCGGCCATTCGTACATGGAA     | GGATACCTCTGCACCGTAGC     | sc                 |
| <i>Gp49a</i>   | AGTGTCGTCACAAAAATAAGGCT   | CCTGGGCGTACACAATTCCC     | sc                 |
| <i>Gpr183</i>  | CTAGCCACCTTCTGATATTGACTGT | ATTGCCATGAGACGTTGCCA     | sc                 |
| <i>Gzma</i>    | TGCTGCCCACTGTAACGTG       | GGTAGGTGAAGGATAGCCACAT   | sc                 |
| <i>Id2</i>     | GGACTCGCATCCCCTATCG       | TCAGATGCCTGCAAGGACAG     | sc                 |
| <i>Il17re</i>  | CCCTCTCTTGGTGAGGAAATC     | GCCTAGCAGCTTCTCTGG       | sc                 |
| <i>Il7r</i>    | GCCAAAAACGAGTCTGAATGTGA   | CTGGCTGTGCAGGAAGATCA     | sc                 |
| <i>Lef1</i>    | GACTTCAGGTACAGGTCCCA      | GTCAGTGTTCTTGGGGTCA      | sc                 |
| <i>Maf</i>     | GTGCAGCAGAGACACGTCCT      | CAACTAGCAAGCCCACTC       | sc                 |
| <i>Mcm2</i>    | ATCCACCACCGCTTCAAGAAC     | TACCACCAAACCTCTCACGGTT   | sc                 |

|                    |                           |                          |       |
|--------------------|---------------------------|--------------------------|-------|
| <i>Myb</i>         | AGACCCCGACACAGCATCTA      | CAGCAGCCCATCGTAGTCAT     | sc    |
| <i>Nfil3</i>       | GGAGCAGAACCACGATAACCC     | CCTCGTCCTACAGACCGGAT     | sc    |
| <i>Notch1</i>      | CCCTTGCTCTGCCTAACGC       | GGAGTCCTGGCATCGTTGG      | sc    |
| <i>Rag2</i>        | CTGGCCTTCAGTGCCAAAAT      | TGACCCACTGTTACCATCTGC    | sc    |
| <i>Rorc</i>        | TGCAAGACTCATCGACAAGG      | AGGGGATTCAACATCAGTGC     | sc    |
| <i>Runx1</i>       | GCAGGCAACGATGAAACTACT     | GCAACTTGTGGCGGATTTGTA    | sc    |
| <i>Scart2</i>      | ACCTGCTGGACTCTCGTTC       | GCCGTCTGCACACATAAGG      | sc    |
| <i>Sfpi1</i>       | ATGTTACAGGCGTGCAAAATGG    | TGATCGCTATGGCTTTCTCCA    | sc    |
| <i>Smo</i>         | GAGCGTAGCTTCCGGGACTA      | CTGGGCCGATTCTTGATCTCA    | sc    |
| <i>Sox13</i>       | GCTTTACCTATTCAGCCCAT      | ACCTCTTCACCACAGGGG       | sc, q |
| <i>Sox4</i>        | CCCTTCTTAAAATTTCTTTTTCTGC | AGGTCCCATGTCCATTTTC      | sc    |
| <i>Syk</i>         | GTGCTGGACTTACGATGTGGA     | TGATCGCTTGGAATCCGTG      | sc    |
| <i>Tbx21</i>       | CATGCCAGGGAACCGCTTAT      | TTGGAAGCCCCCTTGTTGTT     | sc    |
| <i>Tcf12</i>       | ATGTGCTACGAAACCATGCAG     | GCCATTGAGACTGACTGAATCTT  | sc    |
| <i>Tcf3 E12</i>    | GGGAGGAGAAAGAGGATGA       | GCTCCGCCTTCTGCTCTG       | sc    |
| <i>Tcf3 E47</i>    | GGGAGGAGAAAGAGGATGA       | CCGGTCCCTCAGGTCCTTC      | sc    |
| <i>Tcf7</i>        | GCCAGCCTCCACATGGCGTC      | GCTGCCTGAGGTCAGAGAATAA   | sc    |
| <i>Tox</i>         | GCTCCCCTTCCATCCACAAA      | TCCCAATCTCTTGCATCACAGA   | sc    |
| <i>Vd4-Jd1</i>     | TGGACTGCACCTATGACACA      | AGTCACTTGGGTTCTTGTCC     | sc    |
| <i>Vd5-Jd1</i>     | ATGCACAGCACATCCTTGTC      | AGTCACTTGGGTTCTTGTCC     | sc    |
| <i>Vg2-Jg1</i>     | CTGGGAAGCCAACCTGGCAGATGA  | CTTACCAGAGGGAATTACTATGAG | sc, g |
| <i>Zbtb16</i>      | CCCAGTTCTCAAAGGAGGATG     | TTCCCACACAGCAGACAGAAG    | sc    |
| <i>Vd4-Jd1</i>     | AAATCGGGAGACGGACCAA       | GGACAAGGAACCCAAGTGACT    | g     |
| <i>Vd5-Jd1</i>     | TTGGAGAATCCGCATTGTACGTGC  | GGACAAGGAACCCAAGTGACT    | g     |
| <i>Vg2 (total)</i> | CTGGGAAGCCAACCTGGCAGATGA  | GCTTCGTCTTCTTCCCTCCAAGG  | g     |

**Table S5. Related to STAR Methods. Primers used in this study.** For application, sc = single-cell; q = standard RT-qPCR; g = genomic DNA.
